# Supplementary material
Source: MDPI journal article supplement (https://www.mdpi.com/2073-4433/15/4/404)

Chengchen Zhang <sup>1,2</sup>, Xiaorong Dai <sup>3</sup>, Tedros Gebrezgiabhier<sup>1</sup>, Yuan Wang <sup>1</sup>, Mengrong Yang <sup>1</sup>, Leiping Wang <sup>1</sup>, Wei Wang <sup>1</sup>, Zun Man <sup>1</sup>, Yang Meng <sup>1</sup>, Lei Tong <sup>1</sup>, Mengmeng He <sup>1</sup>, Bin Zhou <sup>4</sup>, Jie Zheng <sup>1\*</sup>, and Hang Xiao <sup>1\*</sup>

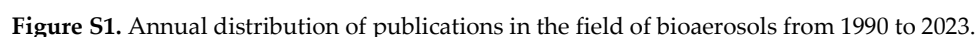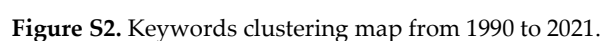

Supplement: s1 [file s1]
